# Supplementary material for: Gut microbiota components are associated with fixed airway obstruction in asthmatic patients living in the tropics
Source: PubMed Central journal article supplement (PMC6018556; doi:10.1038/s41598-018-27964-3), 2018-06-25
Supplement: 41598_2018_27964_MOESM4_ESM.pdf [file 41598_2018_27964_MOESM4_ESM.pdf]

## SUPPLEMENTARY MATERIAL

### **Gut microbiota components are associated with fixed airway obstruction in asthmatic patients living in the tropics**

Emiro Buendía, MD<sup>1</sup>, Josefina Zakzuk, MD, PhD<sup>1</sup>, Homero San Juan Vergara, MD, PhD<sup>2</sup>, Eduardo Zurek, PhD<sup>3</sup>, Nadim J. Ajami, PhD<sup>4</sup> & Luis Caraballo, MD, PhD<sup>1</sup>

<sup>1</sup>Institute for Immunological Research, University of Cartagena, Cartagena, Colombia.

<sup>2</sup>Department of Medicine, Universidad del Norte, Barranquilla, Colombia. <sup>3</sup>Department of System Engineering, Universidad del Norte, Barranquilla, Colombia. <sup>4</sup>Alkek Center for Metagenomics and Microbiome Research, Baylor College, Houston, USA.

\*Correspondence to [icaraballog@unicartagena.edu.co](mailto:icaraballog@unicartagena.edu.co)

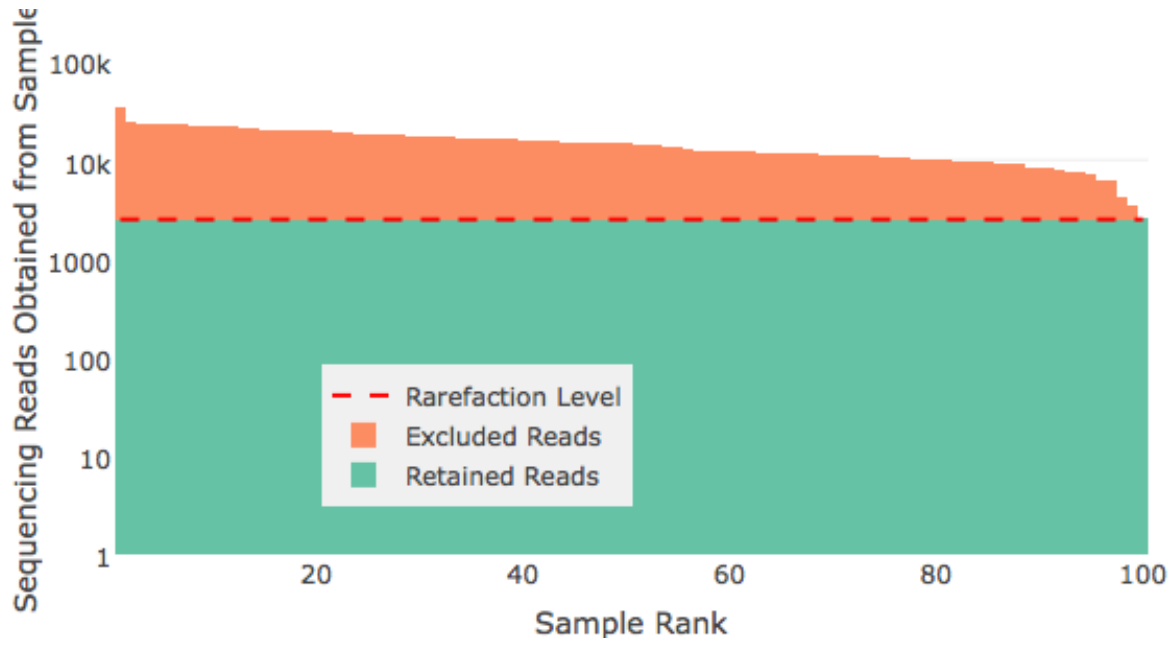

**Supplementary Figure S1.** Retained sequencing reads after rarification, setting a cutoff of 10,000 reads per sample.

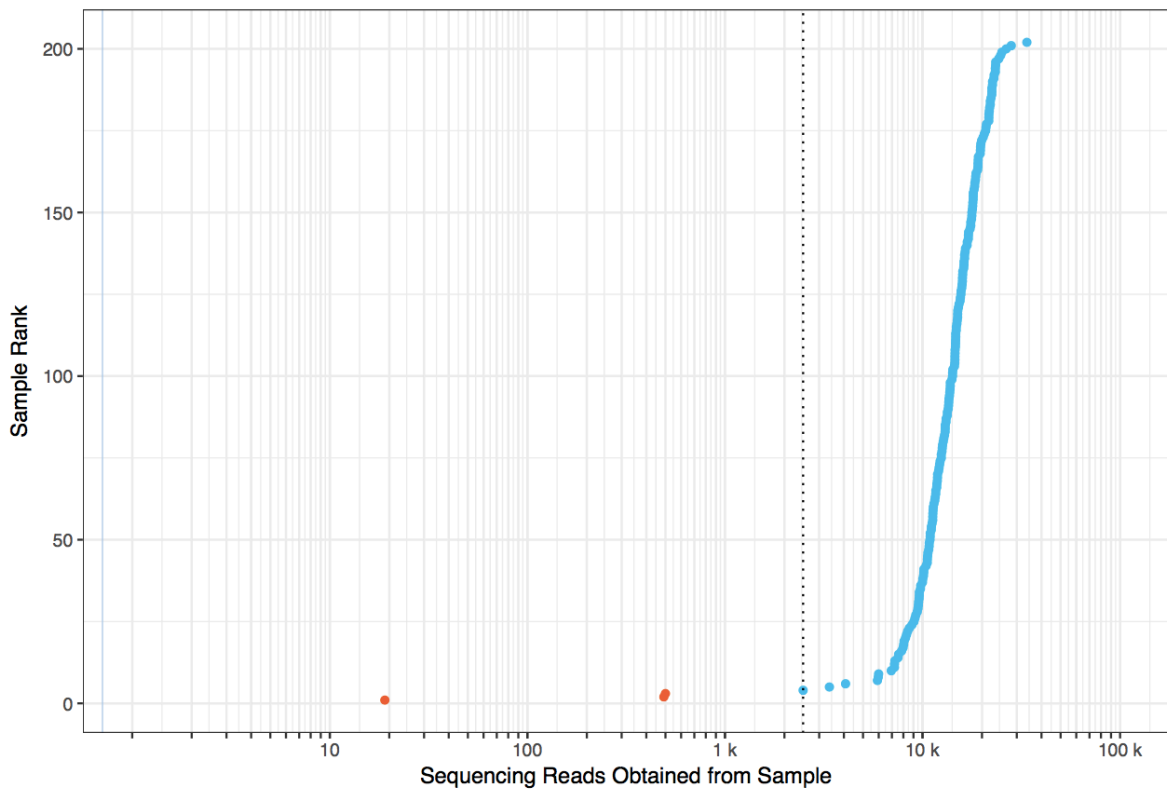

**Supplementary Figure S2.** Retained samples after after rarification, setting a cutoff of 10,000 reads per sample.

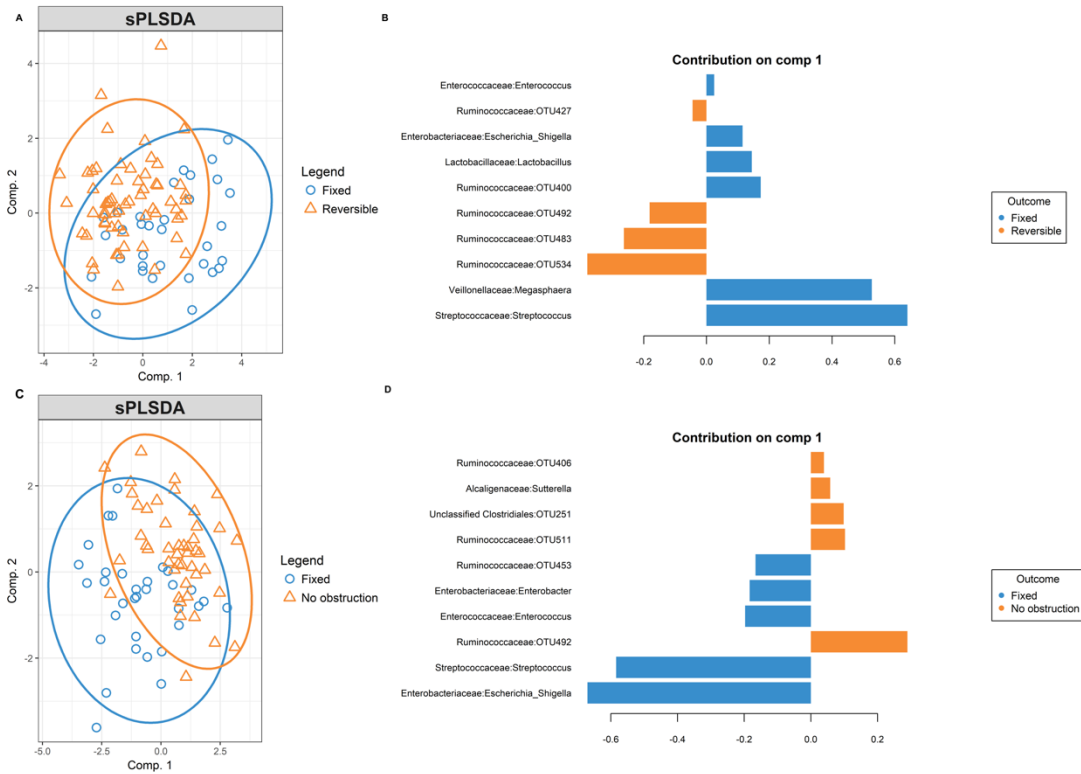

**Supplementary Figure S3. Partial least squares discriminant analysis of gut microbiome composition between patients with fixed airway obstruction versus reversible or no obstruction excluding male patients.** sPLS-DA plot based on the relative abundance of bacterial taxa of gut microbiota from patients with fixed airway obstruction (blue circle), reversible or without obstruction (orange triangle) and their 95% confidence ellipses (**A**). Contribution plot indicating genera contributing to component 1 of the sPLS-DA plot that discriminate these phenotypes (**B**).

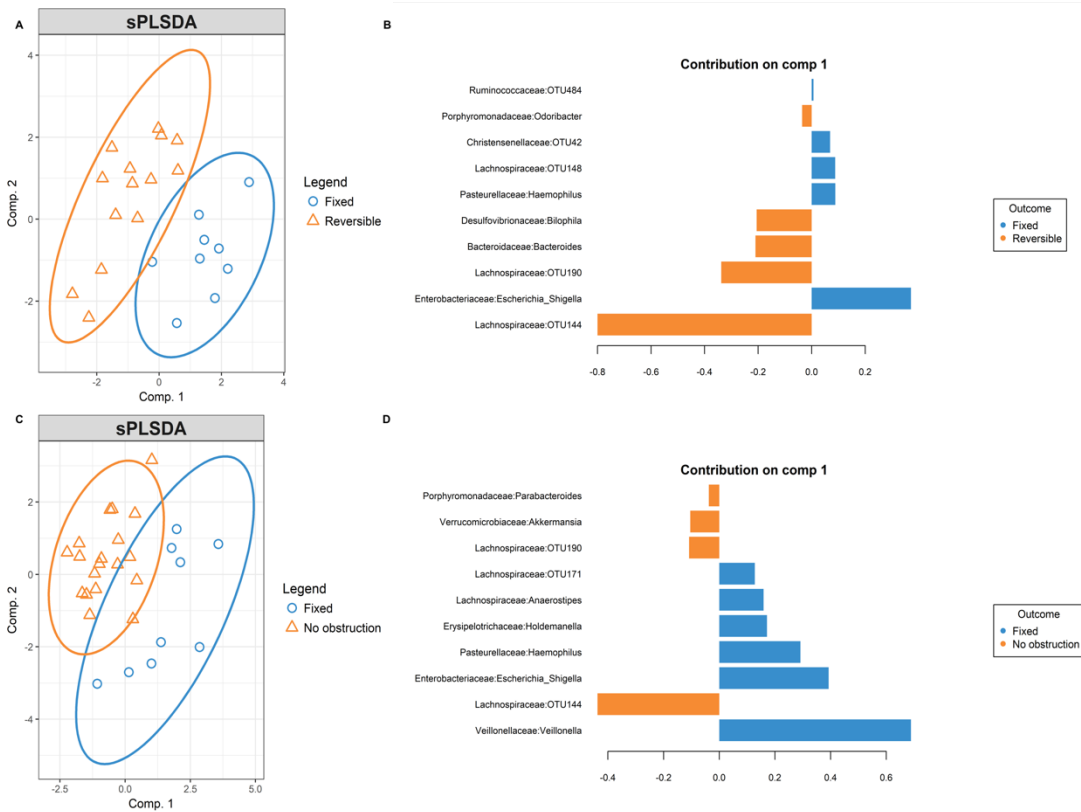

**Supplementary Figure S4. Partial least squares discriminant analysis of gut microbiome composition between patients with fixed airway obstruction versus no obstruction excluding female patients.** sPLS-DA plot based on the relative abundance of bacterial taxa of gut microbiota from patients with fixed airway obstruction (blue circle), reversible or without obstruction (orange triangle) and their 95% confidence ellipses (**A**). Contribution plot indicating genera contributing to component 1 of the sPLS-DA plot that discriminate these phenotypes (**B**).

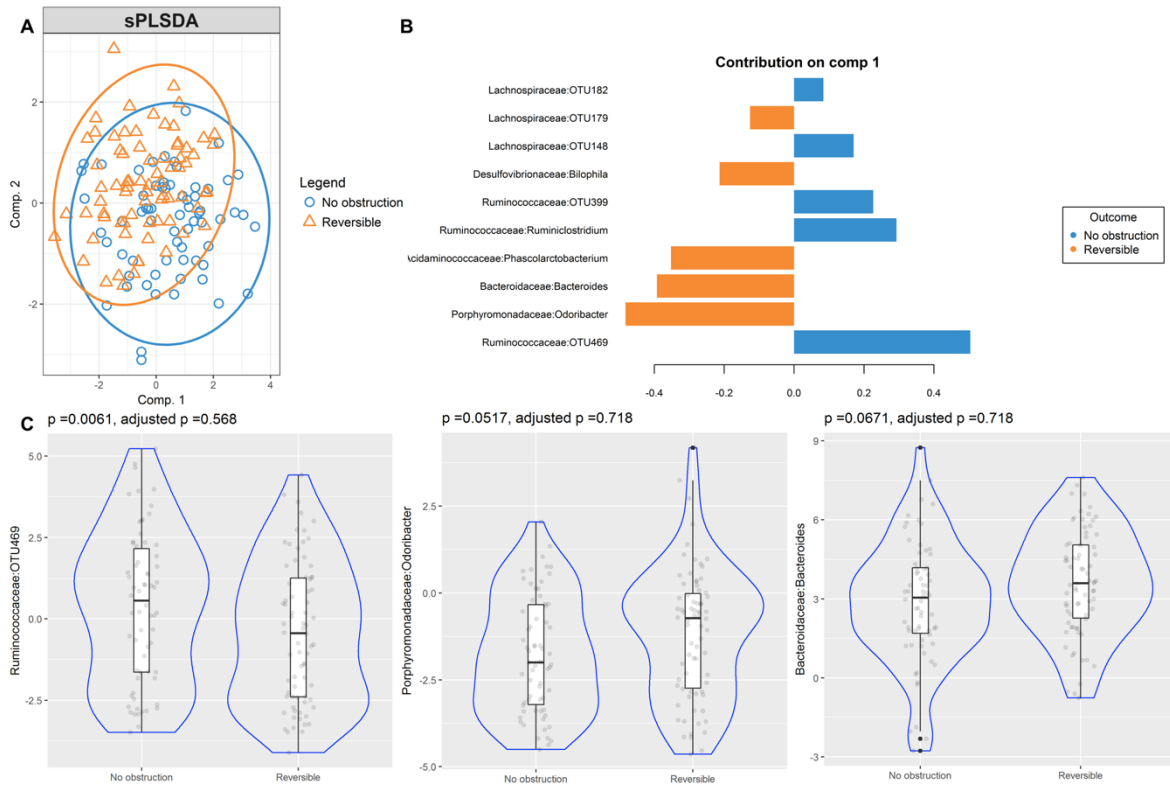

**Supplementary Figure S5. Partial least squares discriminant analysis of gut microbiome composition between patients with no airway obstruction versus reversible obstruction.** sPLS-DA plot based on the relative abundance of bacterial taxa of gut microbiota from patients with no airway obstruction (blue circle) or reversible airway obstruction (orange triangle) and their 95% confidence ellipses (**A**). Contribution plot indicating genera contributing to component 1 of the sPLS-DA plot that discriminate these phenotypes (**B**). The abundance of the most consistent OTUs was compared using Metagenomeseq and presented on a violin plot, which includes the median, 95% CI, IQR, and density plot where the width of the blue lines indicate frequency (**C**).

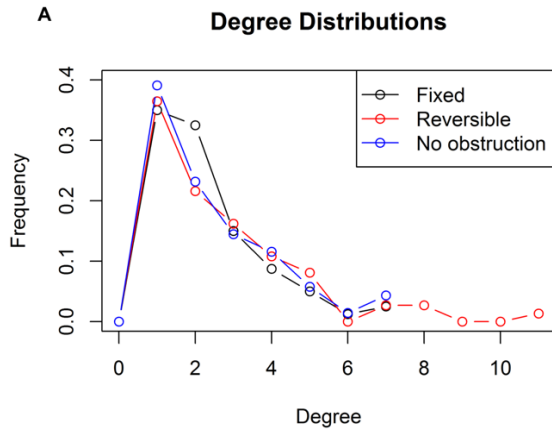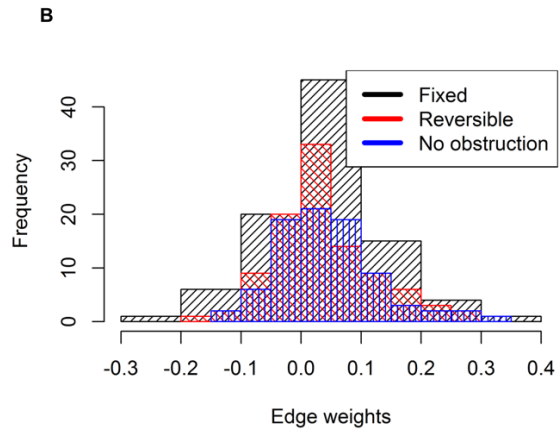

**Supplementary Figure S6. Edge weights and degree distribution graphs.** (A) Shows the distribution of connections per node. (B) Shows the frequency with which the weight of the arcs in each network occurs.

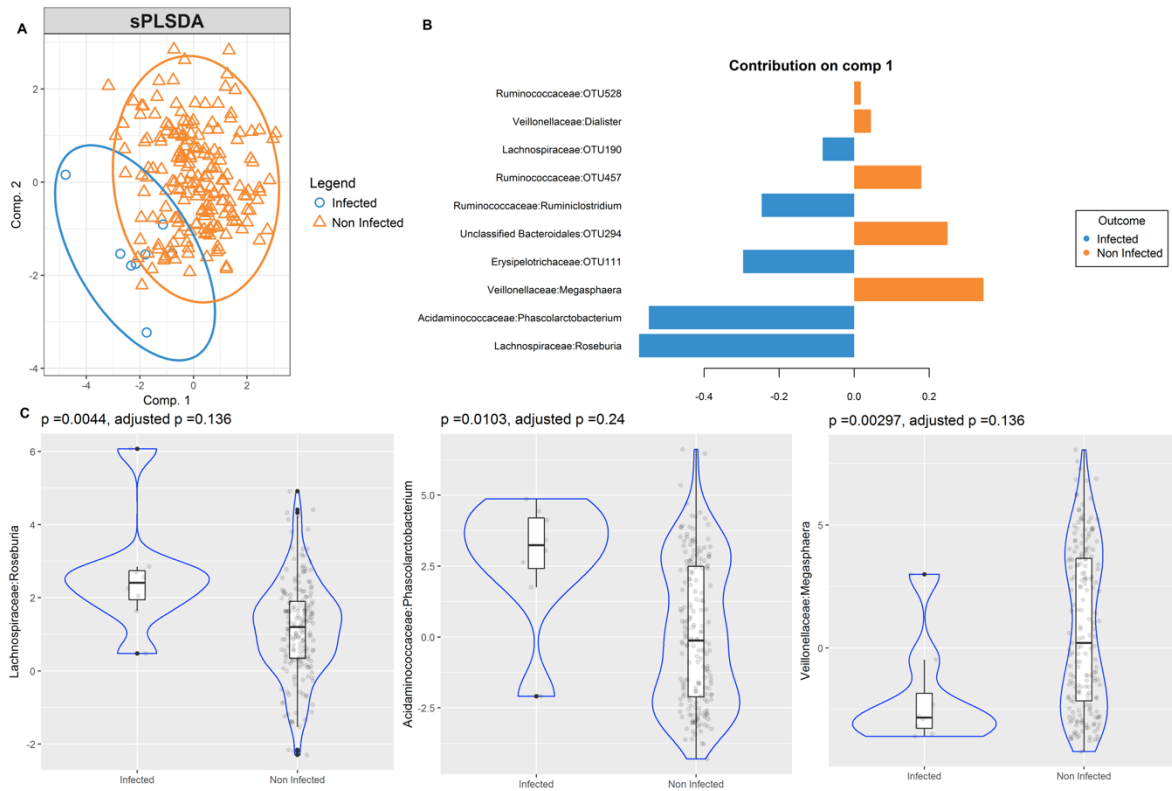

**Supplementary Figure S7. Partial least squares discriminant analysis of gut microbiome composition in regard to *Ascaris* infection.** sPLS-DA plot based on the relative abundance of bacterial taxa of gut microbiota from patients infected (blue circle) or not (orange triangle) and their 95% confidence ellipses (**A**). Contribution plot indicating genera contributing to component 1 of the sPLS-DA plot that discriminate first and fourth sIgE percentiles (**B**). The abundance of the most consistent OTUs was compared using Metagenomeseq and presented on a violin plot, which includes the median, 95% CI, IQR, and density plot where the width of the blue lines indicate frequency (**C**).
